# Supplementary material for: S-allylmercaptocysteine inhibits TLR4-mediated inflammation through enhanced formation of inhibitory MyD88 splice variant in mammary epithelial cells
Source: PubMed Central journal article supplement (PMC11604973; doi:10.1038/s41598-024-81304-2), 2024-11-28
Supplement: 41598_2024_81304_MOESM1_ESM.pdf [file 41598_2024_81304_MOESM1_ESM.pdf]

## Supplementary Information

### ***S*-Allylmercaptocysteine inhibits TLR4-mediated inflammation through enhanced formation of inhibitory MyD88 splice variant in mammary epithelial cells**

Miyuki Takashima<sup>1\*</sup>, Masahiro Kurita<sup>2</sup>, Haruhi Terai<sup>2</sup>,  
Feng-Qi Zhao<sup>3</sup>, and Jun-ichiro Suzuki<sup>2</sup>

<sup>1</sup> Drug Discovery Laboratory, Wakunaga Pharmaceutical Co., Ltd., Hiroshima, 1624 Shimokotachi, Koda-cho, Akitakata-shi, Hiroshima, 739-1195, Japan.

<sup>2</sup> Central Research Institute, Wakunaga Pharmaceutical Co., Ltd., Hiroshima, 1624 Shimokotachi, Koda-cho, Akitakata-shi, Hiroshima, 739-1195, Japan.

<sup>3</sup> Department of Animal and Veterinary Sciences, University of Vermont, 102 Terrill, 570 Main Street, Burlington, VT, 05405, USA.

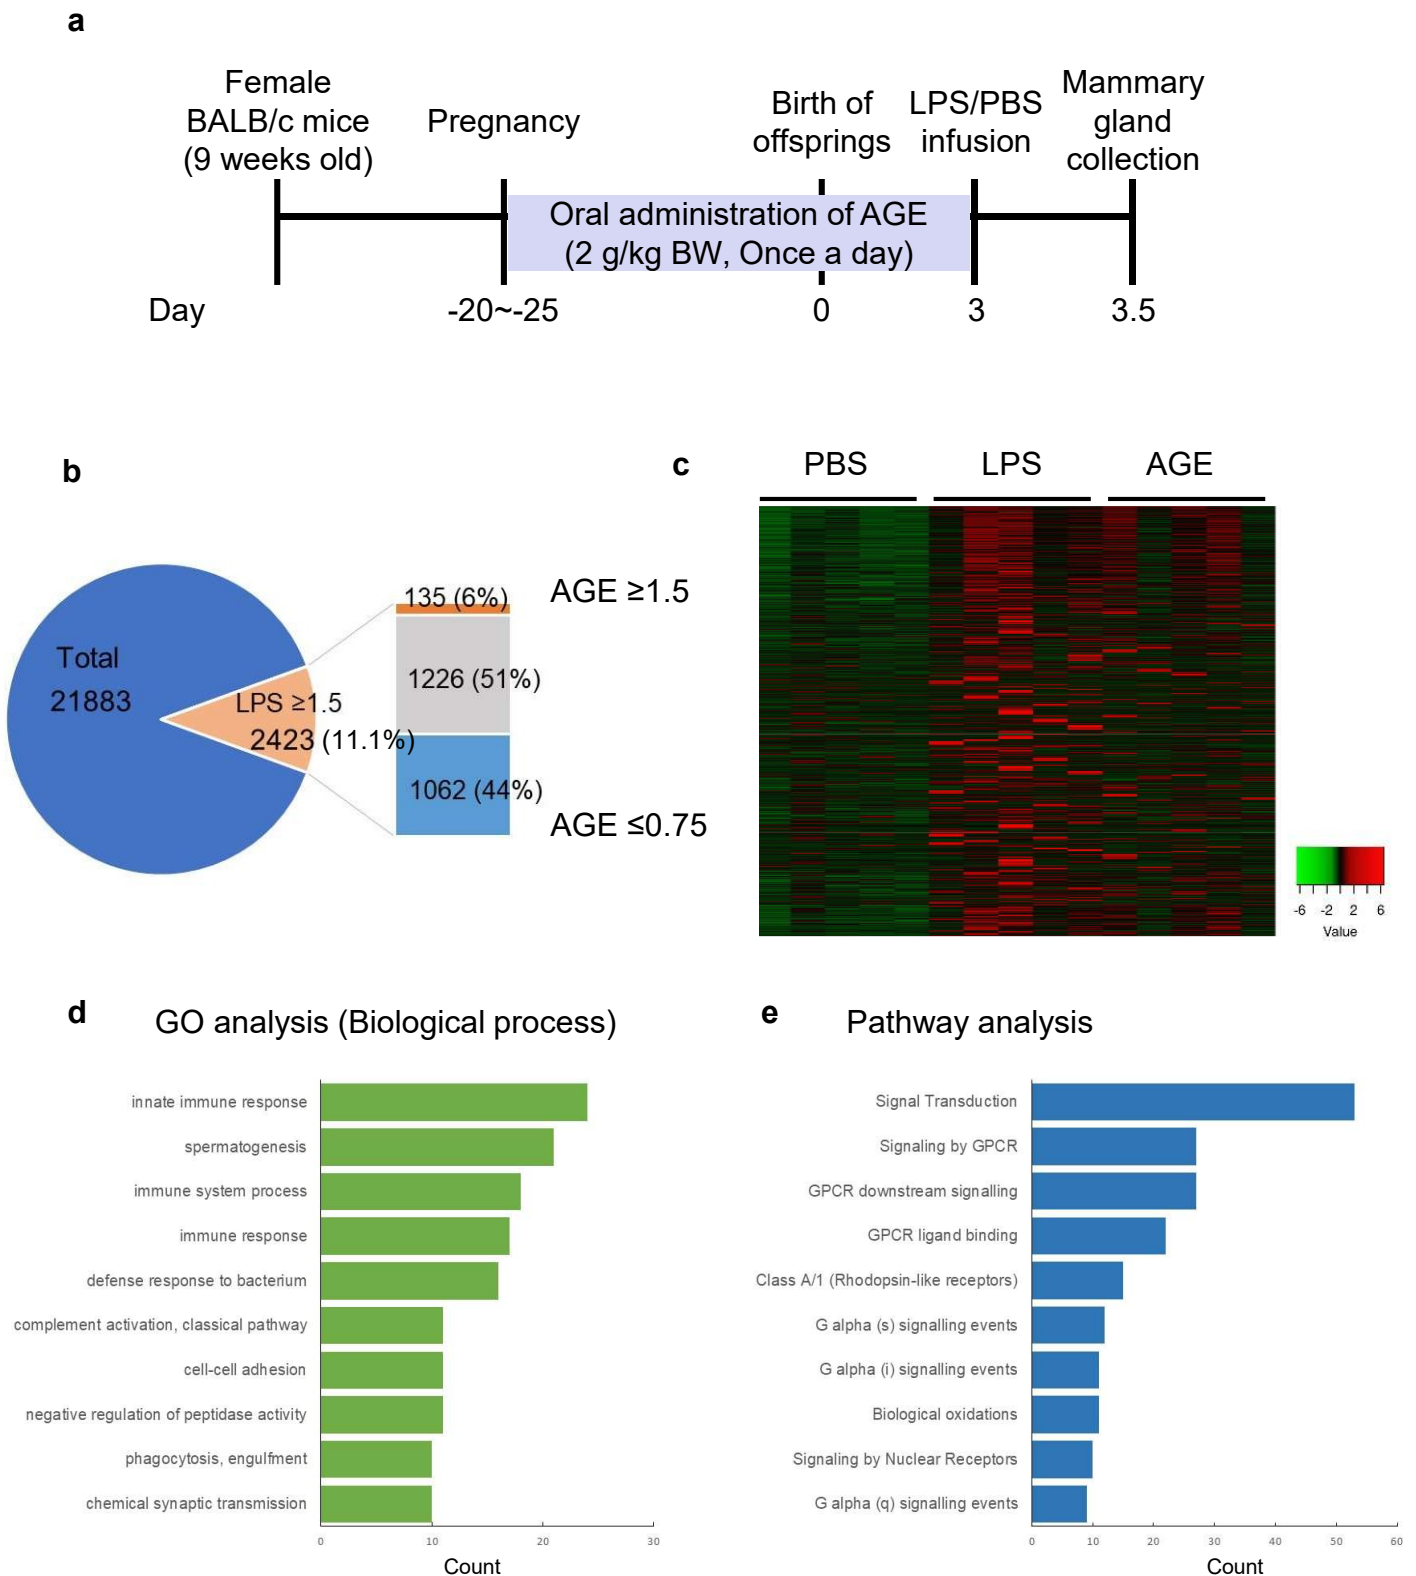

**Supplemental Figure S1.** Effects of aged garlic extract (AGE) treatment on transcriptome of the mammary glands treated with lipopolysaccharide (LPS) in mice ( $n=5$ ). (a) Workflow of animal treatment. (b) The proportion of genes increased by intramammary LPS injection ( $\geq 1.5$ -fold vs PBS-injected side, 11.1%) and the proportions of these genes increased ( $\geq 1.5$ -fold vs LPS-injected tissues of control mice, 6.0%) or decreased ( $\leq 0.75$ -fold, 44.0%) by AGE administration. (c) The heatmap of gene expression increased by LPS ( $\geq 1.5$ -fold). PBS and LPS columns show the gene expression in the mammary glands of PBS- and LPS-injected side of control mice, respectively. AGE column shows the gene expression in the LPS-injected mammary glands of mice administered with AGE. (d, e) Gene ontology (GO) term annotation for biological process (d) and pathway analysis (e) of the genes increased by LPS injection ( $\geq 1.5$ -fold) and decreased by AGE administration ( $\leq 0.75$ -fold).

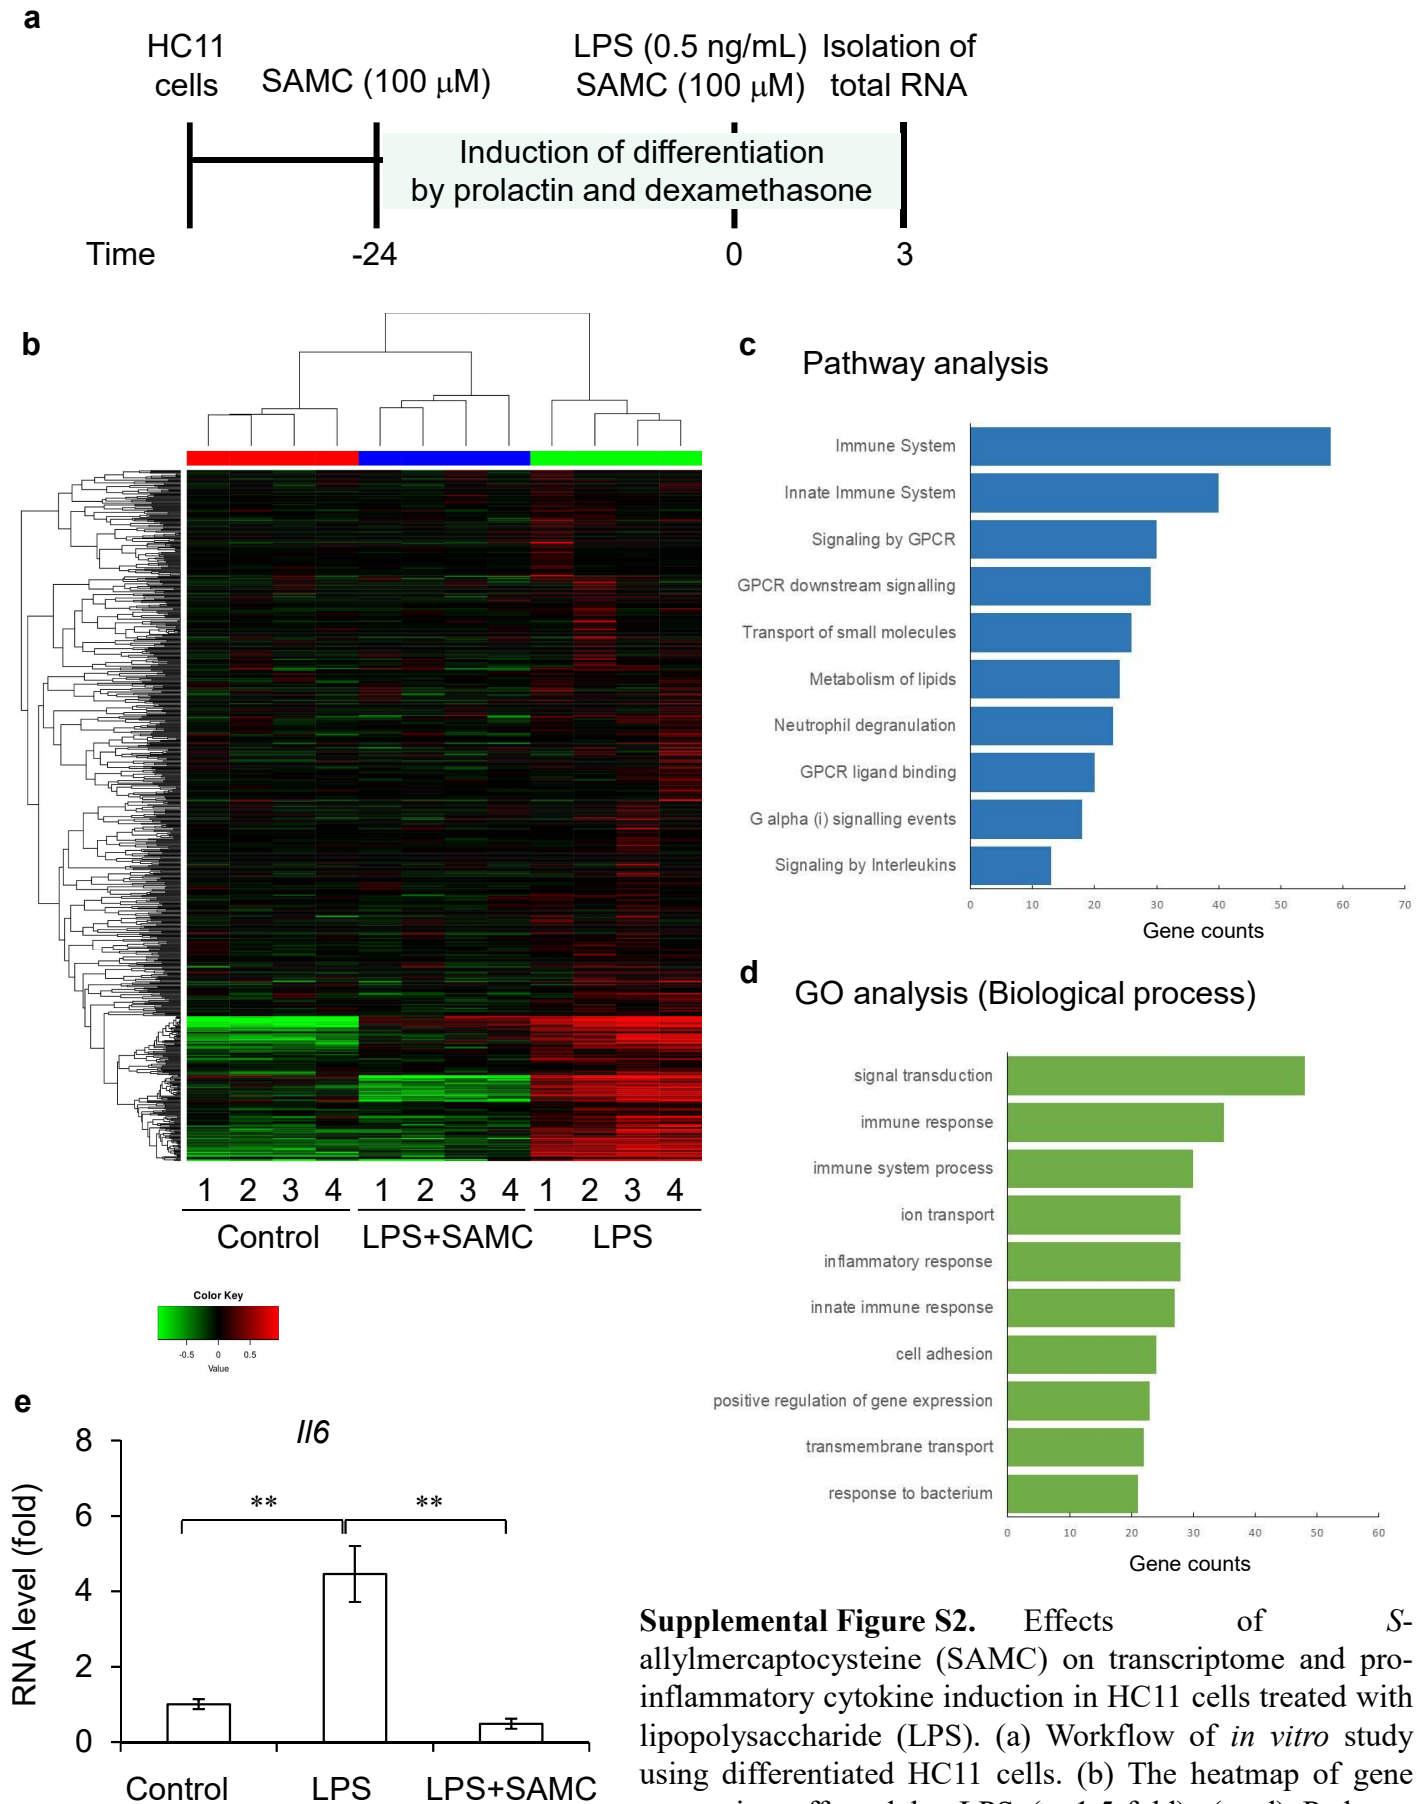

**Supplemental Figure S2.** Effects of *S*-allylmercaptocysteine (SAMC) on transcriptome and pro-inflammatory cytokine induction in HC11 cells treated with lipopolysaccharide (LPS). (a) Workflow of *in vitro* study using differentiated HC11 cells. (b) The heatmap of gene expression affected by LPS ( $\geq 1.5$ -fold). (c, d) Pathway analysis (c) and GO term annotation for biological process (d) of the genes increased by LPS ( $\geq 1.5$ -fold) and decreased by SAMC treatment ( $\leq 0.75$ -fold). (e) mRNA expression of *Il6* in HC11 cells was examined by real-time quantitative PCR. Data are shown as mean  $\pm$  SD,  $n = 4-5$ . \*\* denotes significant difference ( $p < 0.01$ ).

Sample: 1

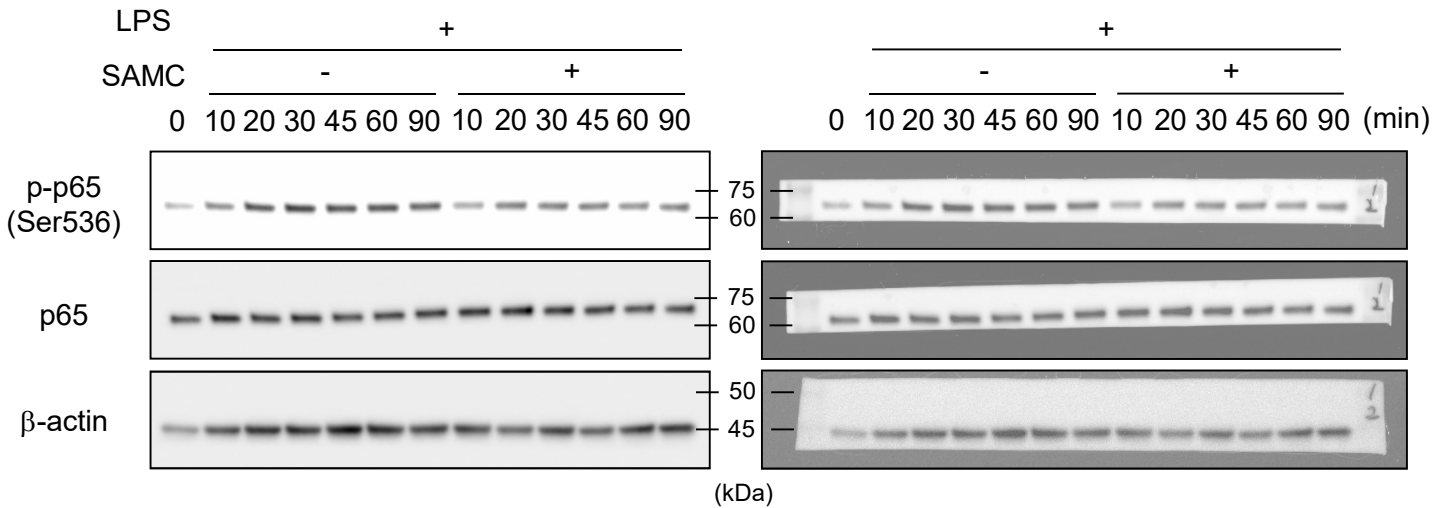

Sample: 2

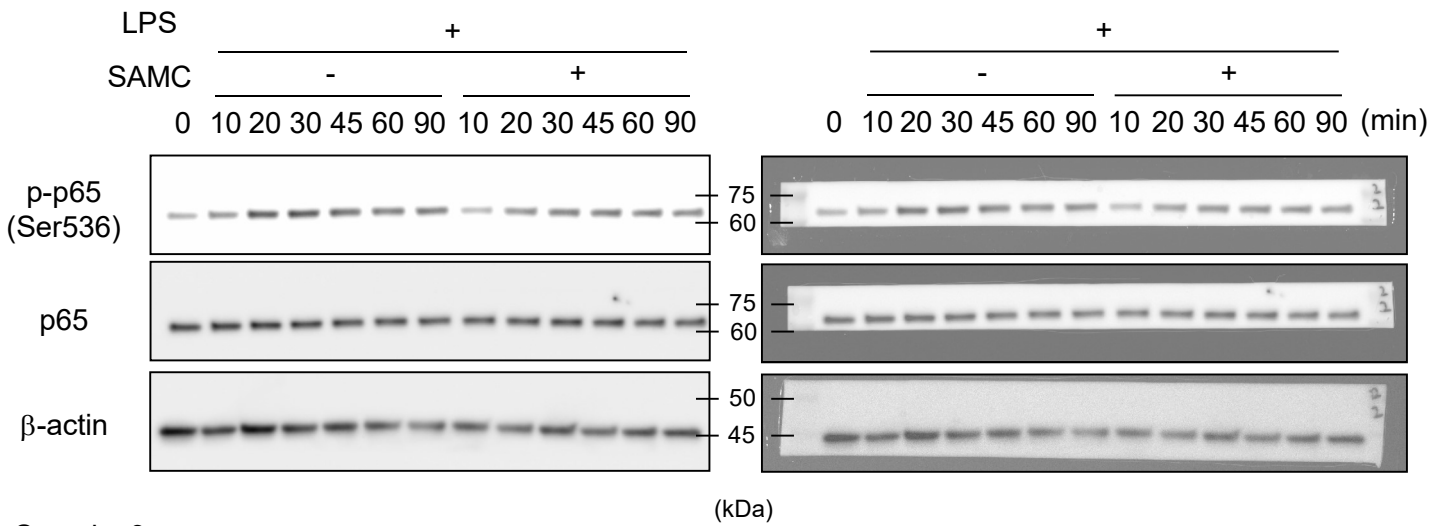

Sample: 3

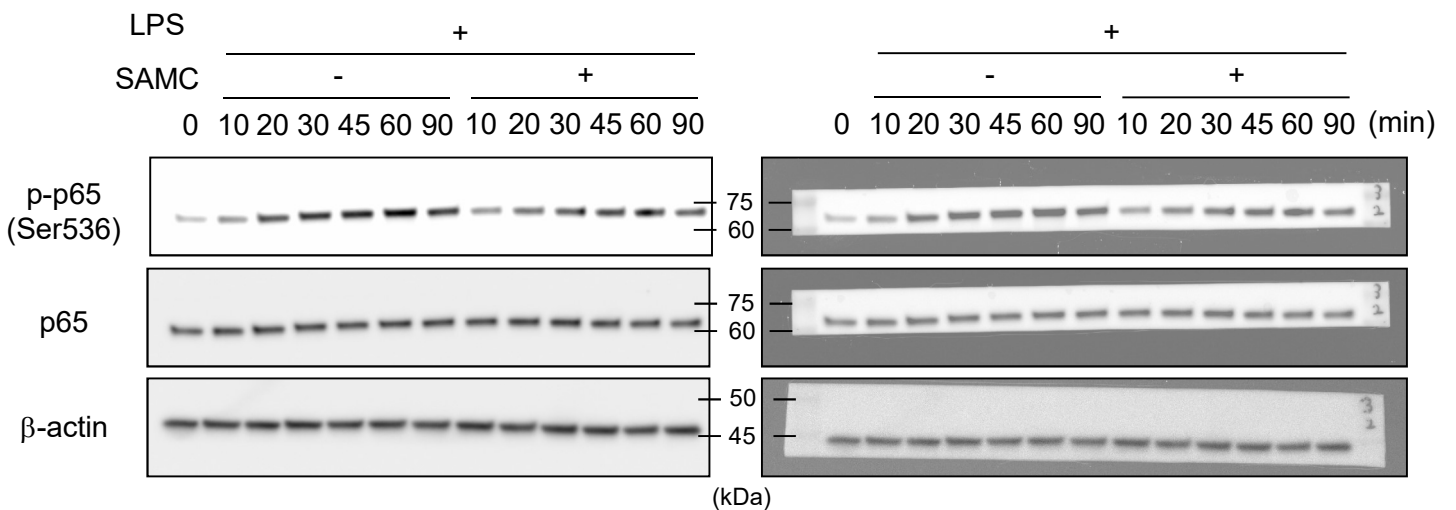

**Supplemental Figure S3.** Western blots of NF-κB p65 phosphorylation in HC11 cells treated with or without lipopolysaccharide (LPS) and *S*-allylmercaptocysteine (SAMC). Molecular size markers are indicated between the blots used in Fig. 1c. Kda = kilodalton.

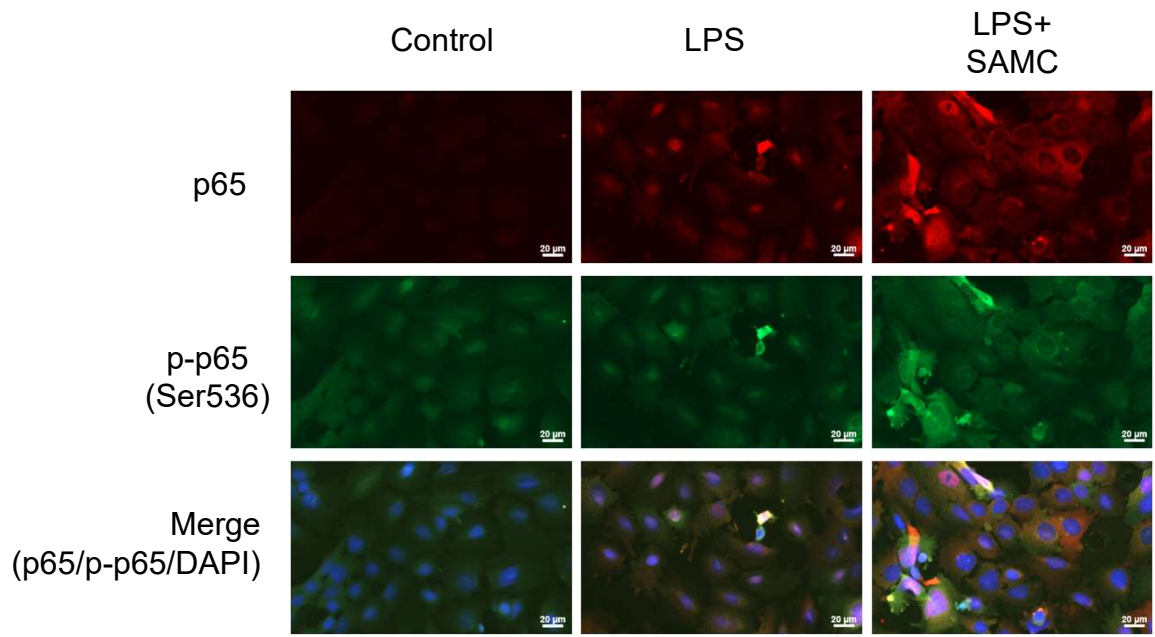

**Supplementary Figure S4.** Effect of *S*-allylmercaptocysteine (SAMC) on lipopolysaccharide (LPS)-induced activation of NF- $\kappa$ B p65. HC11 cells were immunostained with anti-p65 (red), anti-p-p65 (Ser536) (green) and DAPI (nucleus) (blue) after stimulation with LPS (100 ng/mL) in the presence or absence of SAMC (300  $\mu$ M) for 1 h. Scale bar, 50  $\mu$ m.

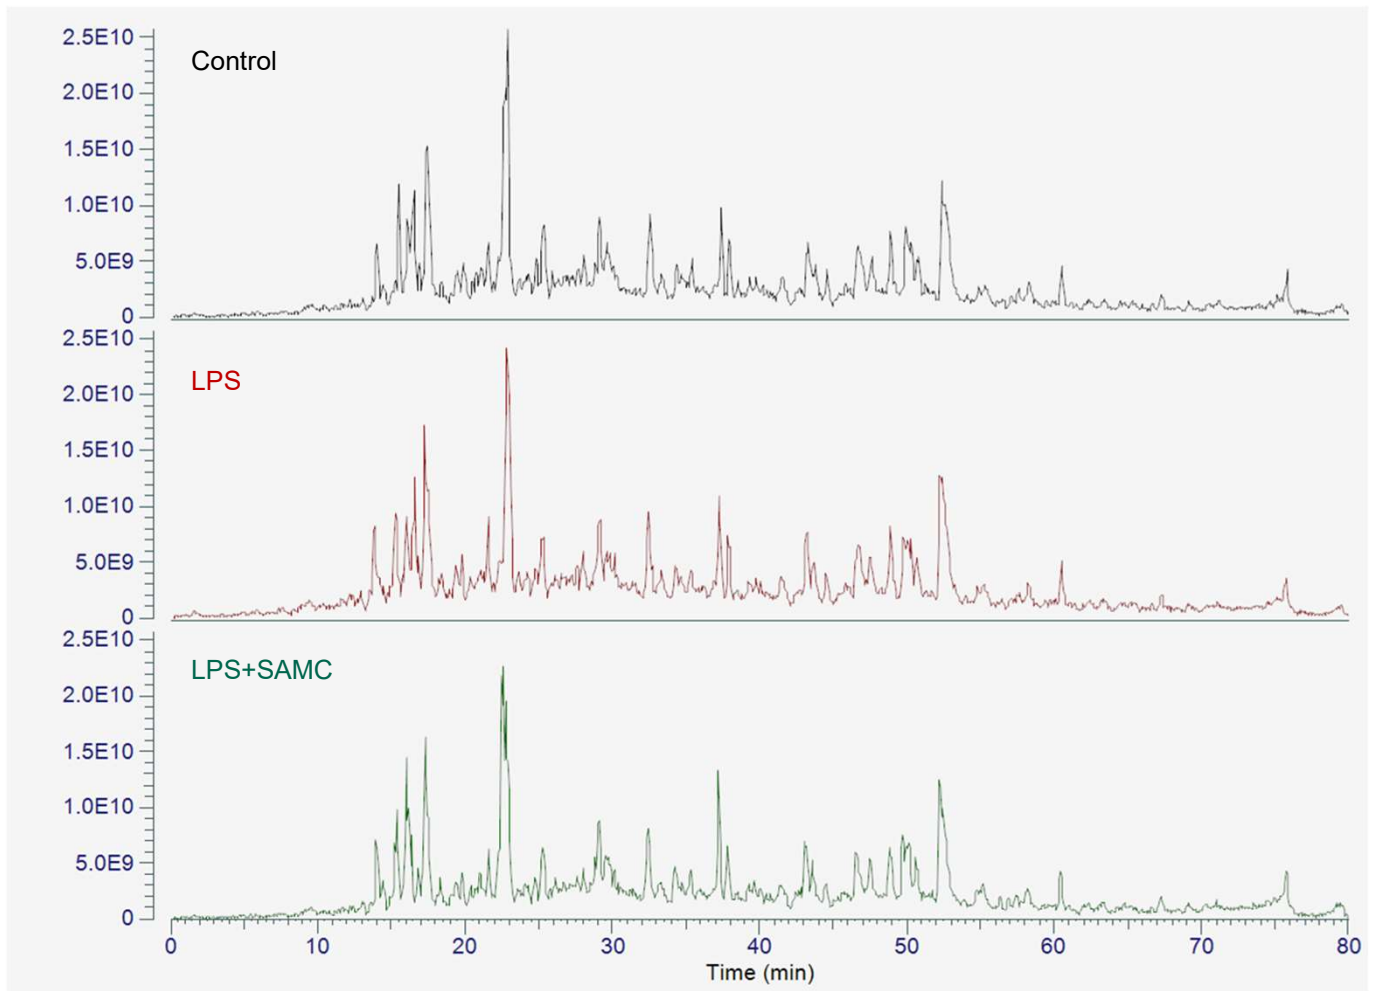

**Supplementary Figure S5.** Total ion current chromatograms obtained from data-independent acquisition-MS analysis of phospho-peptide extracts.





## a Pathway analysis

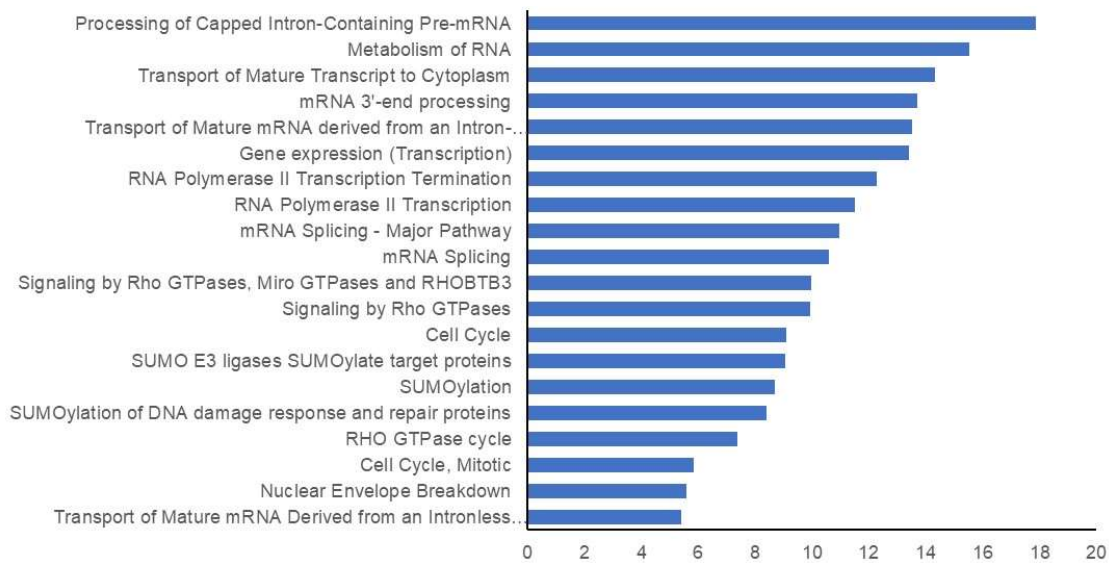

## b Biological process

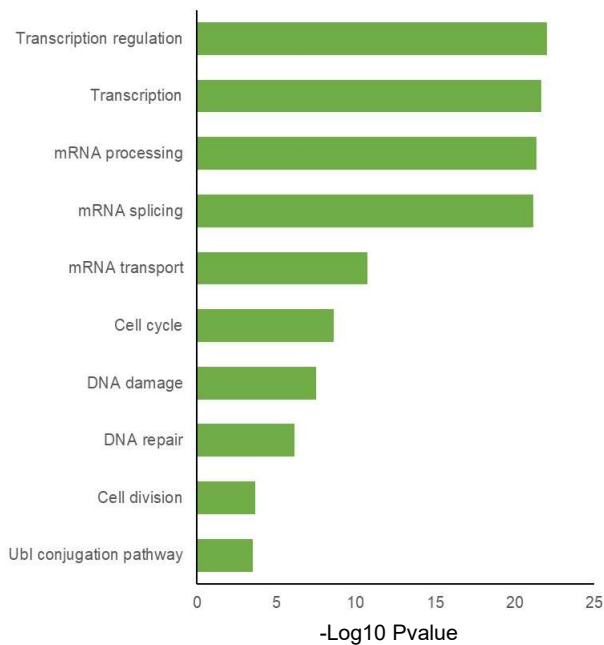

## c Molecular function

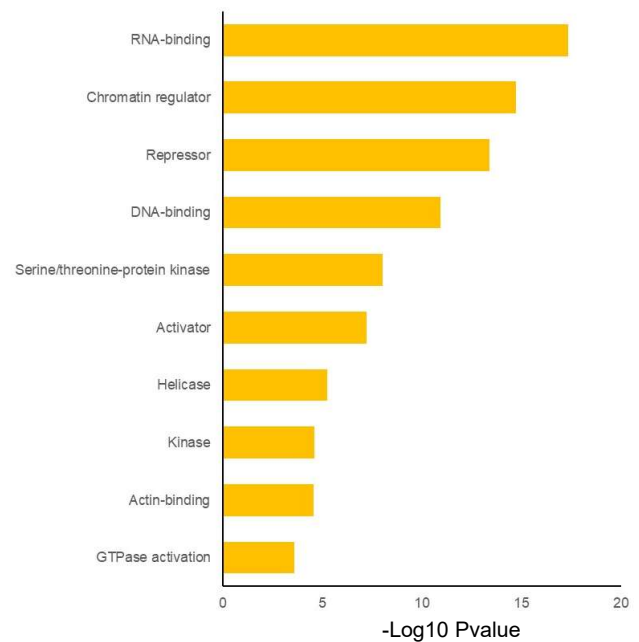

**Supplementary Figure S7.** Effect of lipopolysaccharide (LPS) on phosphorylation of mRNA splicing-related proteins. Pathway analysis (a), gene ontology term annotation for biological process (b) and molecular function (c) of the genes increased by LPS ( $\geq 1.5$ -fold vs. Control).



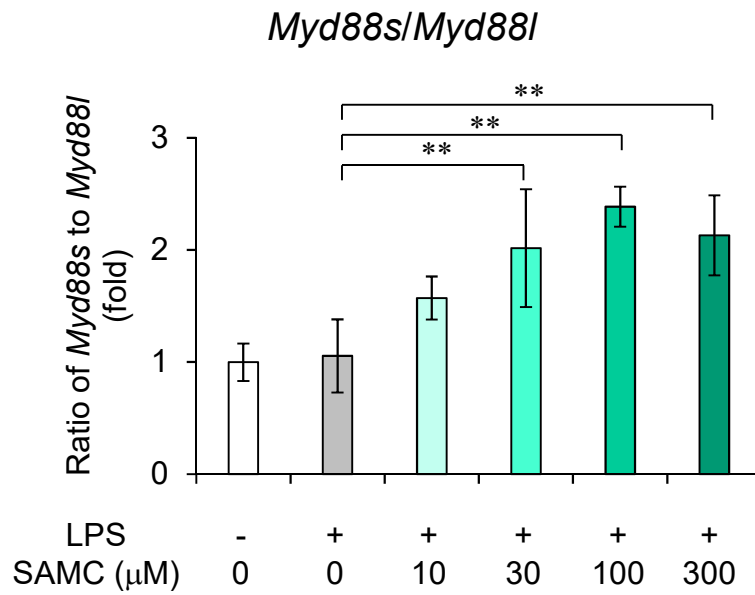

**Supplementary Figure S8.** *S*-Allylmercaptocysteine (SAMC) increases the mRNA expression ratio of *Myd88s* to canonical *Myd88l*. Real-time qPCR analysis of the concentration-dependent effect of SAMC (10-300 μM) on the mRNA expression ratio of *Myd88s* to canonical *Myd88l* in HC11 cells treated with lipopolysaccharide (LPS) stimulation for 2 h. Data are shown as mean ± SD, n = 5. \*\* denotes significant difference ( $p < 0.01$ ).

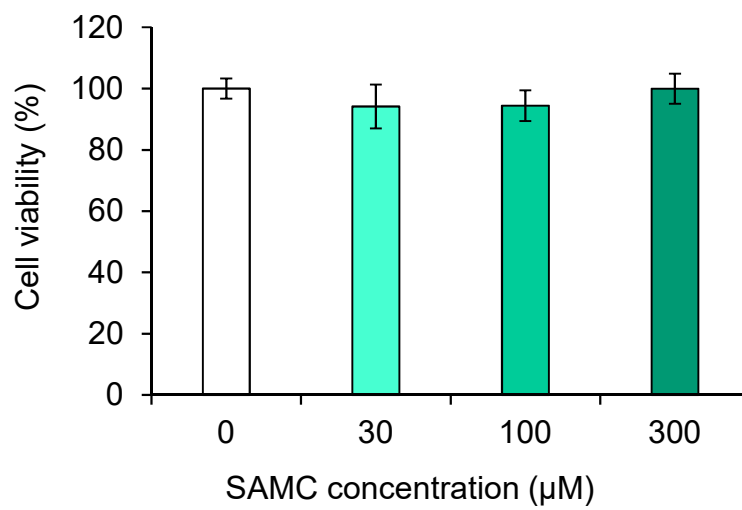

**Supplementary Figure S9.** *S*-Allylmercaptocysteine (SAMC) has no effect on the viability of HC11 cells. After treatment with SAMC (30-300 µM) for 24 h, the HC11 cell viability was evaluated by WST-8 assay. Data are shown as mean  $\pm$  SD, n = 5.

**Supplementary Table S1.** Primer sequences used in this study.

| Genes               |         | Primer sequences                       |
|---------------------|---------|----------------------------------------|
| Mouse <i>Il6</i>    | forward | 5'-ATGATGCTGGTGACAACCACGG-3'           |
|                     | reverse | 5'-CAGGTCTGTTGGGAGTGGTATCC-3'          |
| Mouse <i>Tnf</i>    | forward | 5'-CTGAACTTCGGGGTGATCGG-3'             |
|                     | reverse | 5'-GGCTTGTCACTCGAATTTTGAGA-3'          |
| Mouse <i>Cxcl1</i>  | forward | 5'-CACTGCACCCAAACCGAAGTC-3'            |
|                     | reverse | 5'-GGGAGCTTCAGGGTCAAGGC-3'             |
| Mouse <i>Ccl2</i>   | forward | 5'-CATCCACGTGTTGGCTCA-3'               |
|                     | reverse | 5'-GATCATCTTGCTGGTGAATGAGT-3'          |
| Mouse <i>Myd88s</i> | forward | 5'-GGAGCTGAAGTCGCGCATCGGACAAAC-3'      |
|                     | reverse | 5'-GTCTGTTCTAGTTGCCGGATCATCTCCTGCAC-3' |
| Mouse <i>MyD88l</i> | forward | 5'-ACCACCCTTGATGACCCCCT-3'             |
|                     | reverse | 5'-GTCACGGTCGGACACACACA-3'             |
| Mouse <i>Hprt</i>   | forward | 5'-GCAGTACAGCCCCAAAATGG-3'             |
|                     | reverse | 5'-TCCAACAAAGTCTGGCCTGT-3'             |
